# Supplementary material for: Apparent nosocomial adaptation of Enterococcus faecalis predates the modern hospital era
Source: PubMed Central journal article supplement (PMC7943827; doi:10.1038/s41467-021-21749-5), 2021-03-09
Supplement: 41467_2021_21749_MOESM3_ESM.pdf [file 41467_2021_21749_MOESM3_ESM.pdf]

## Descriptions of Additional Supplementary Files

### **Supplementary Data 1**

**Description:** Gene content comparison of hospital-associated clusters and commensal isolates of *E. faecalis* using logistic regression analysis and Bonferroni correction.

### **Supplementary Data 2**

**Description:** Collection-wide screening of antimicrobial resistance and virulence genes in *E. faecalis*.
